# Supplementary figures and images for: MEK1 Inhibitor Combined with Irradiation Reduces Migration of Breast Cancer Cells Including miR-221 and ZEB1 EMT Marker Expression
Source: MDPI journal article supplement (doi:10.3390/cancers12123760), 2020-12-14

**Figure S1**

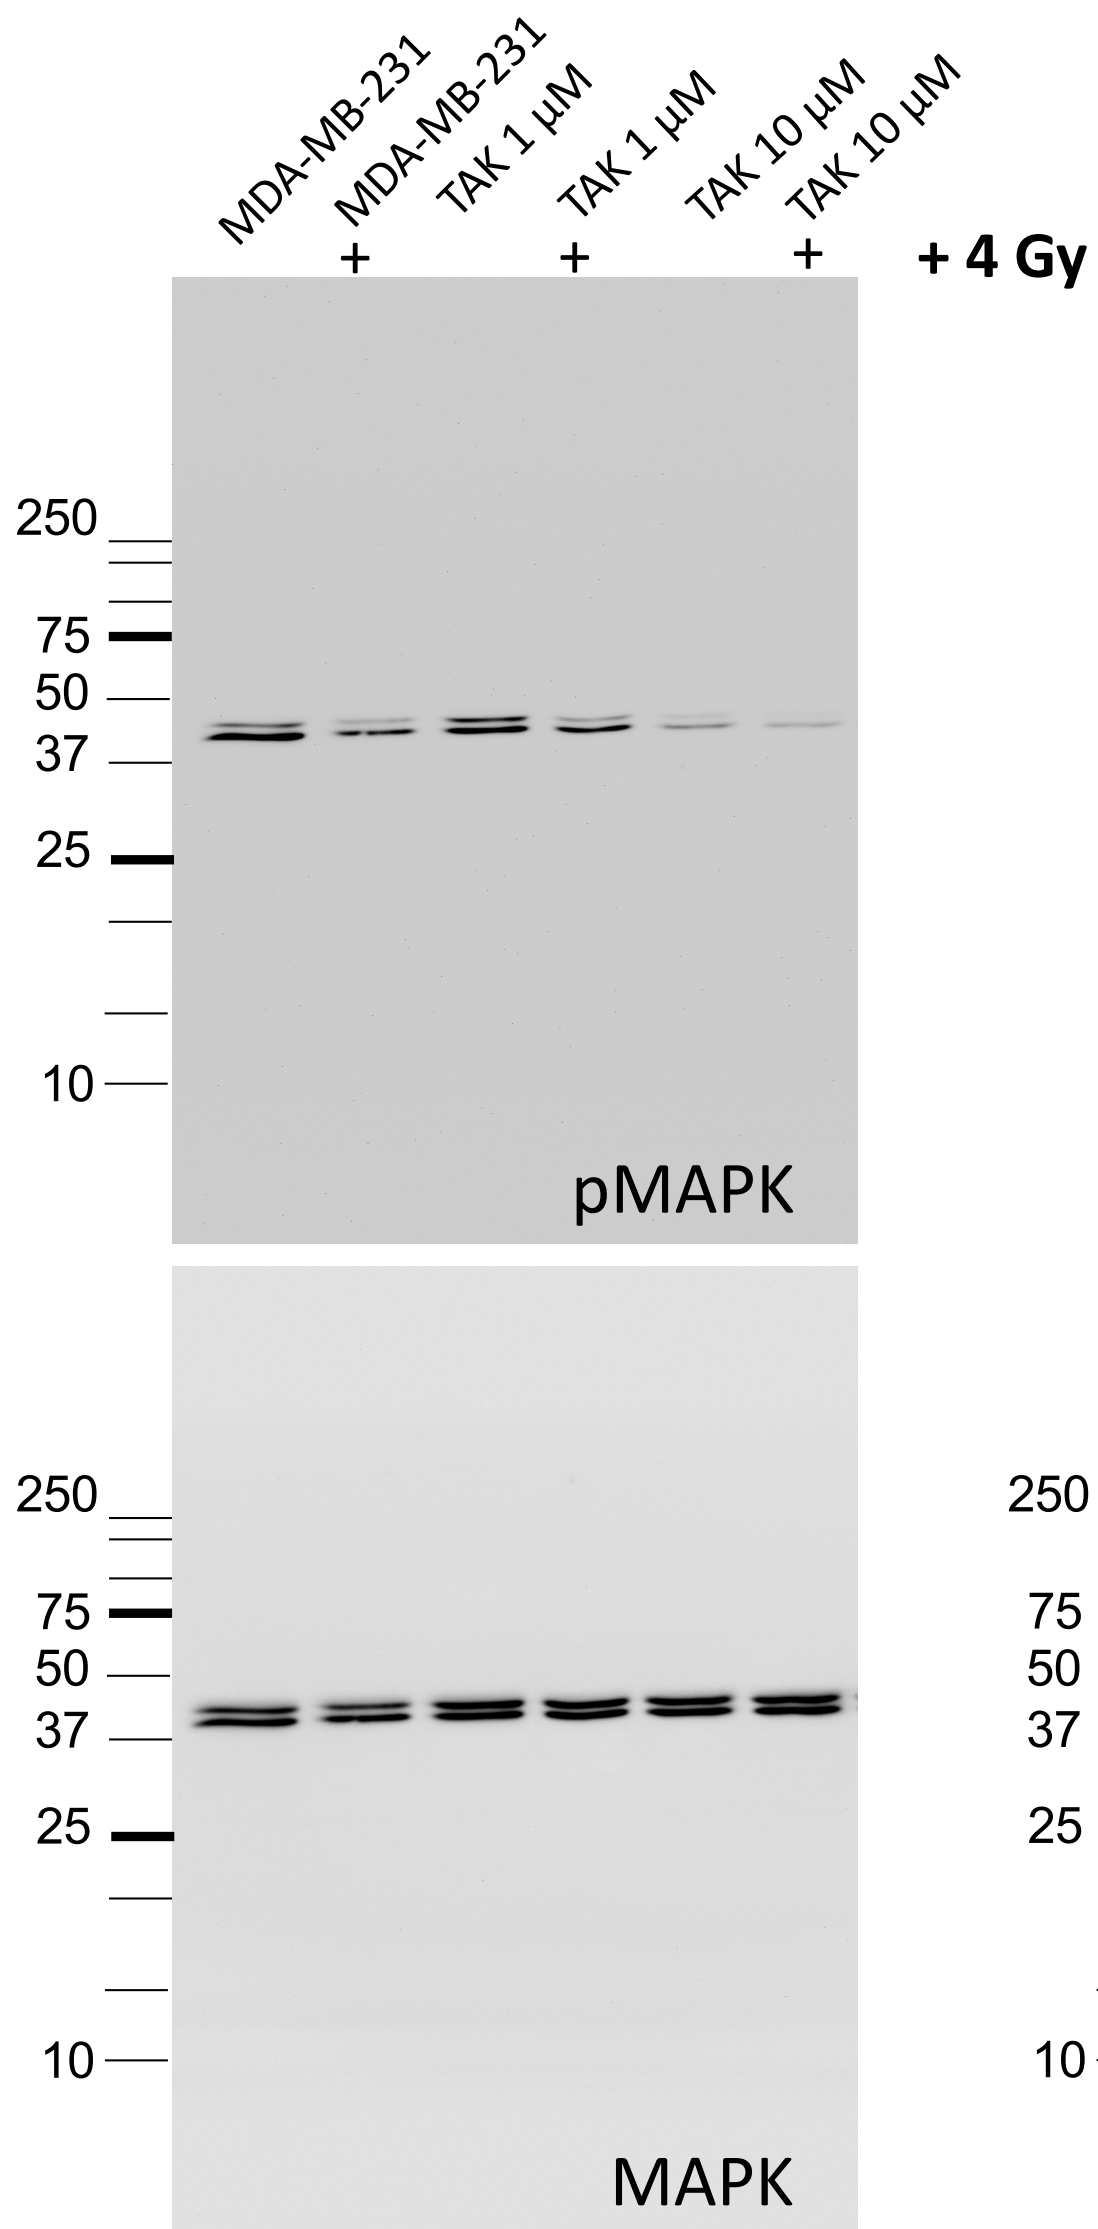

Supplement: s1 [file s1]

Figure S2

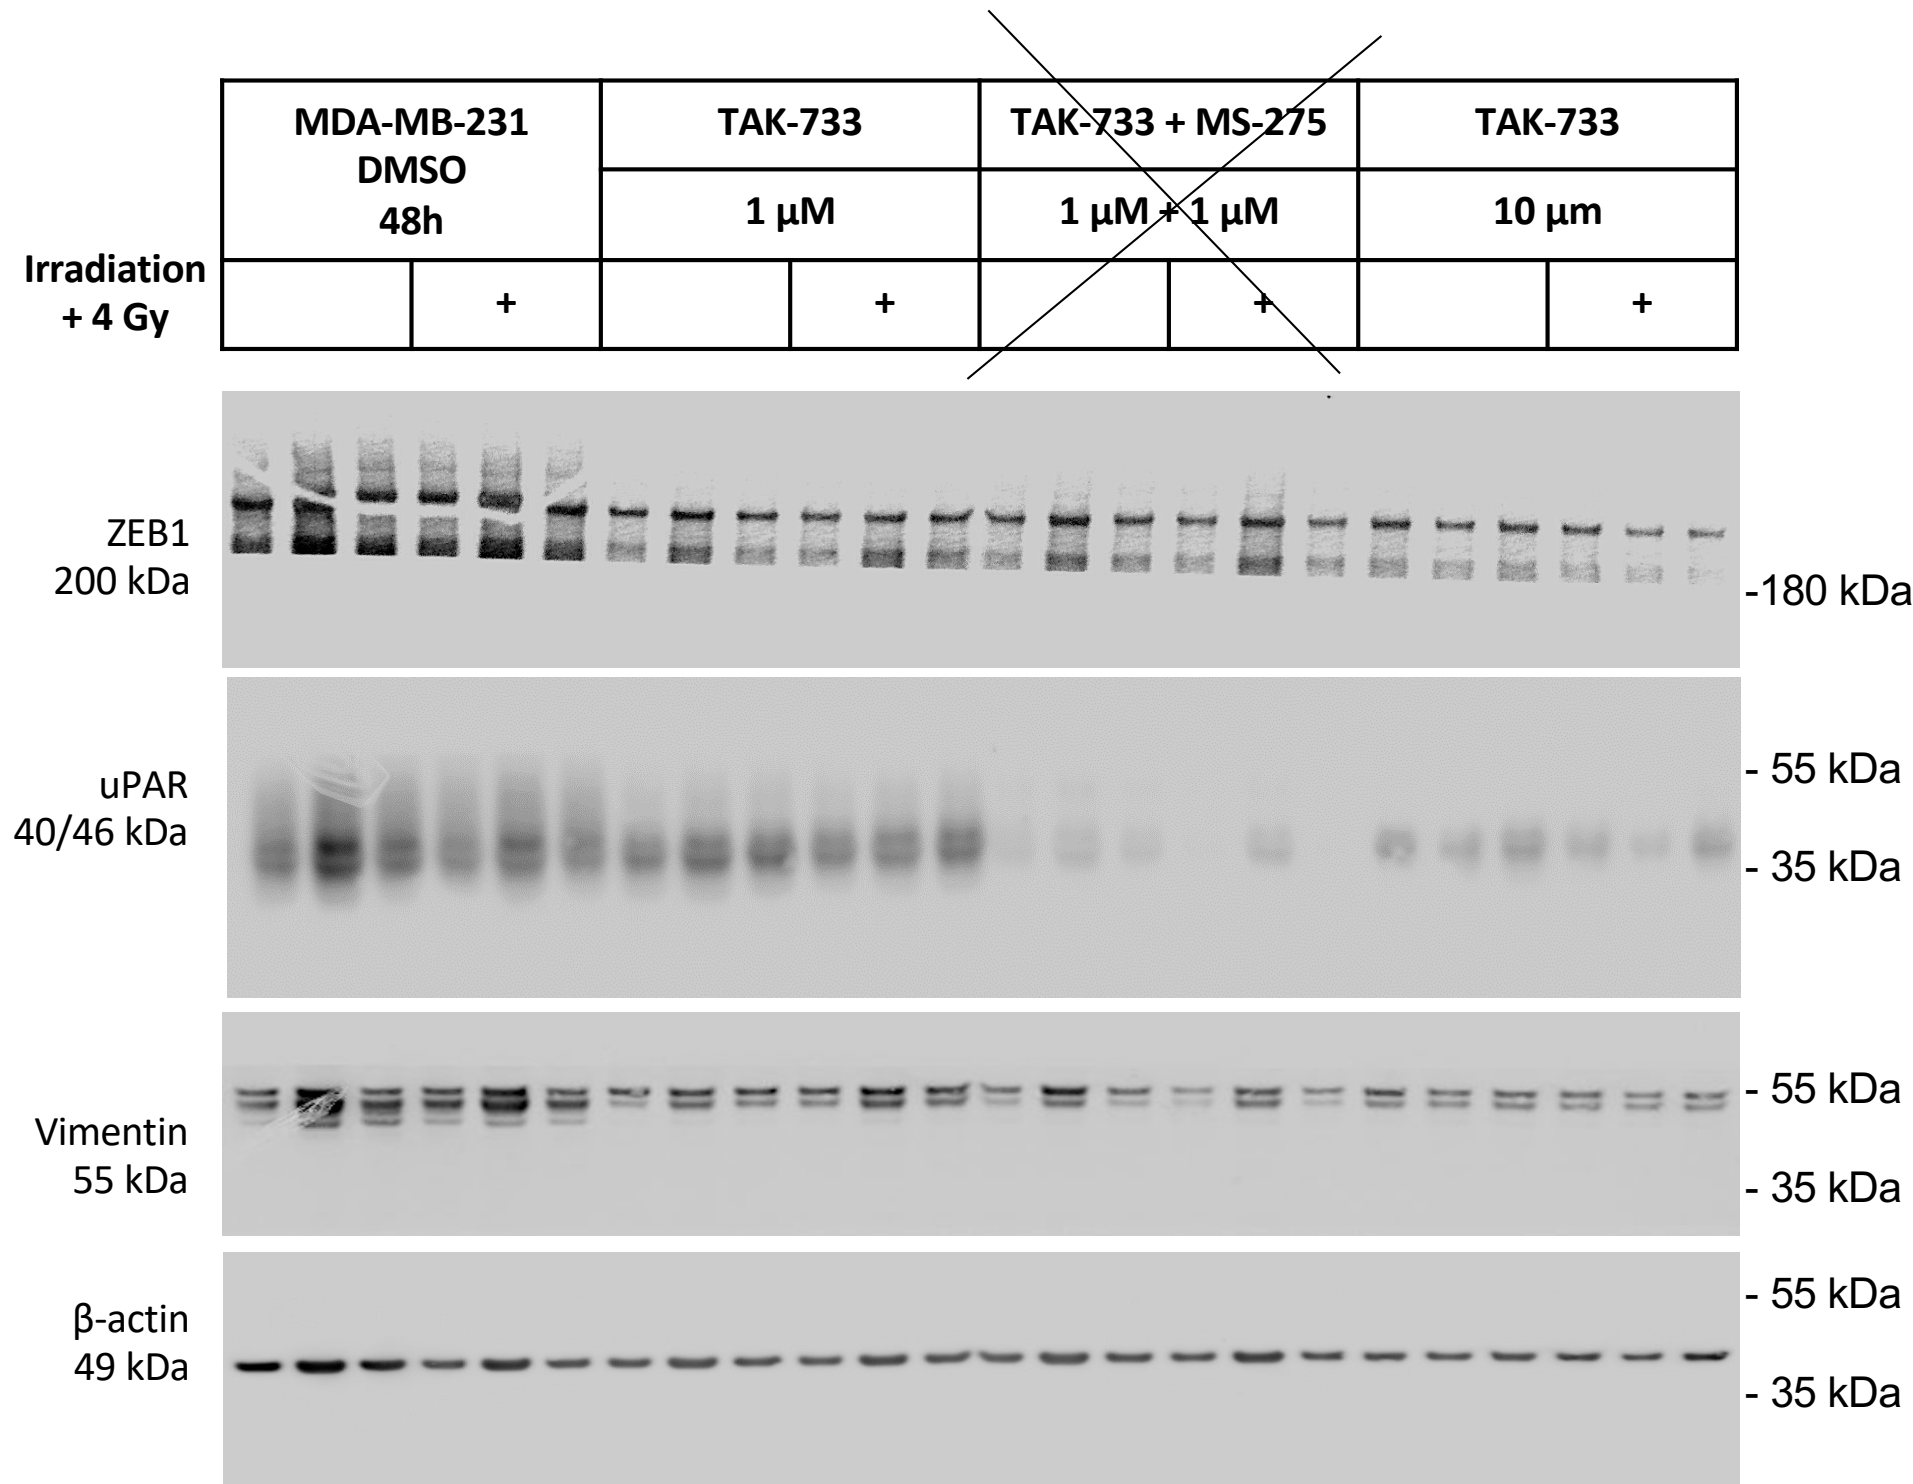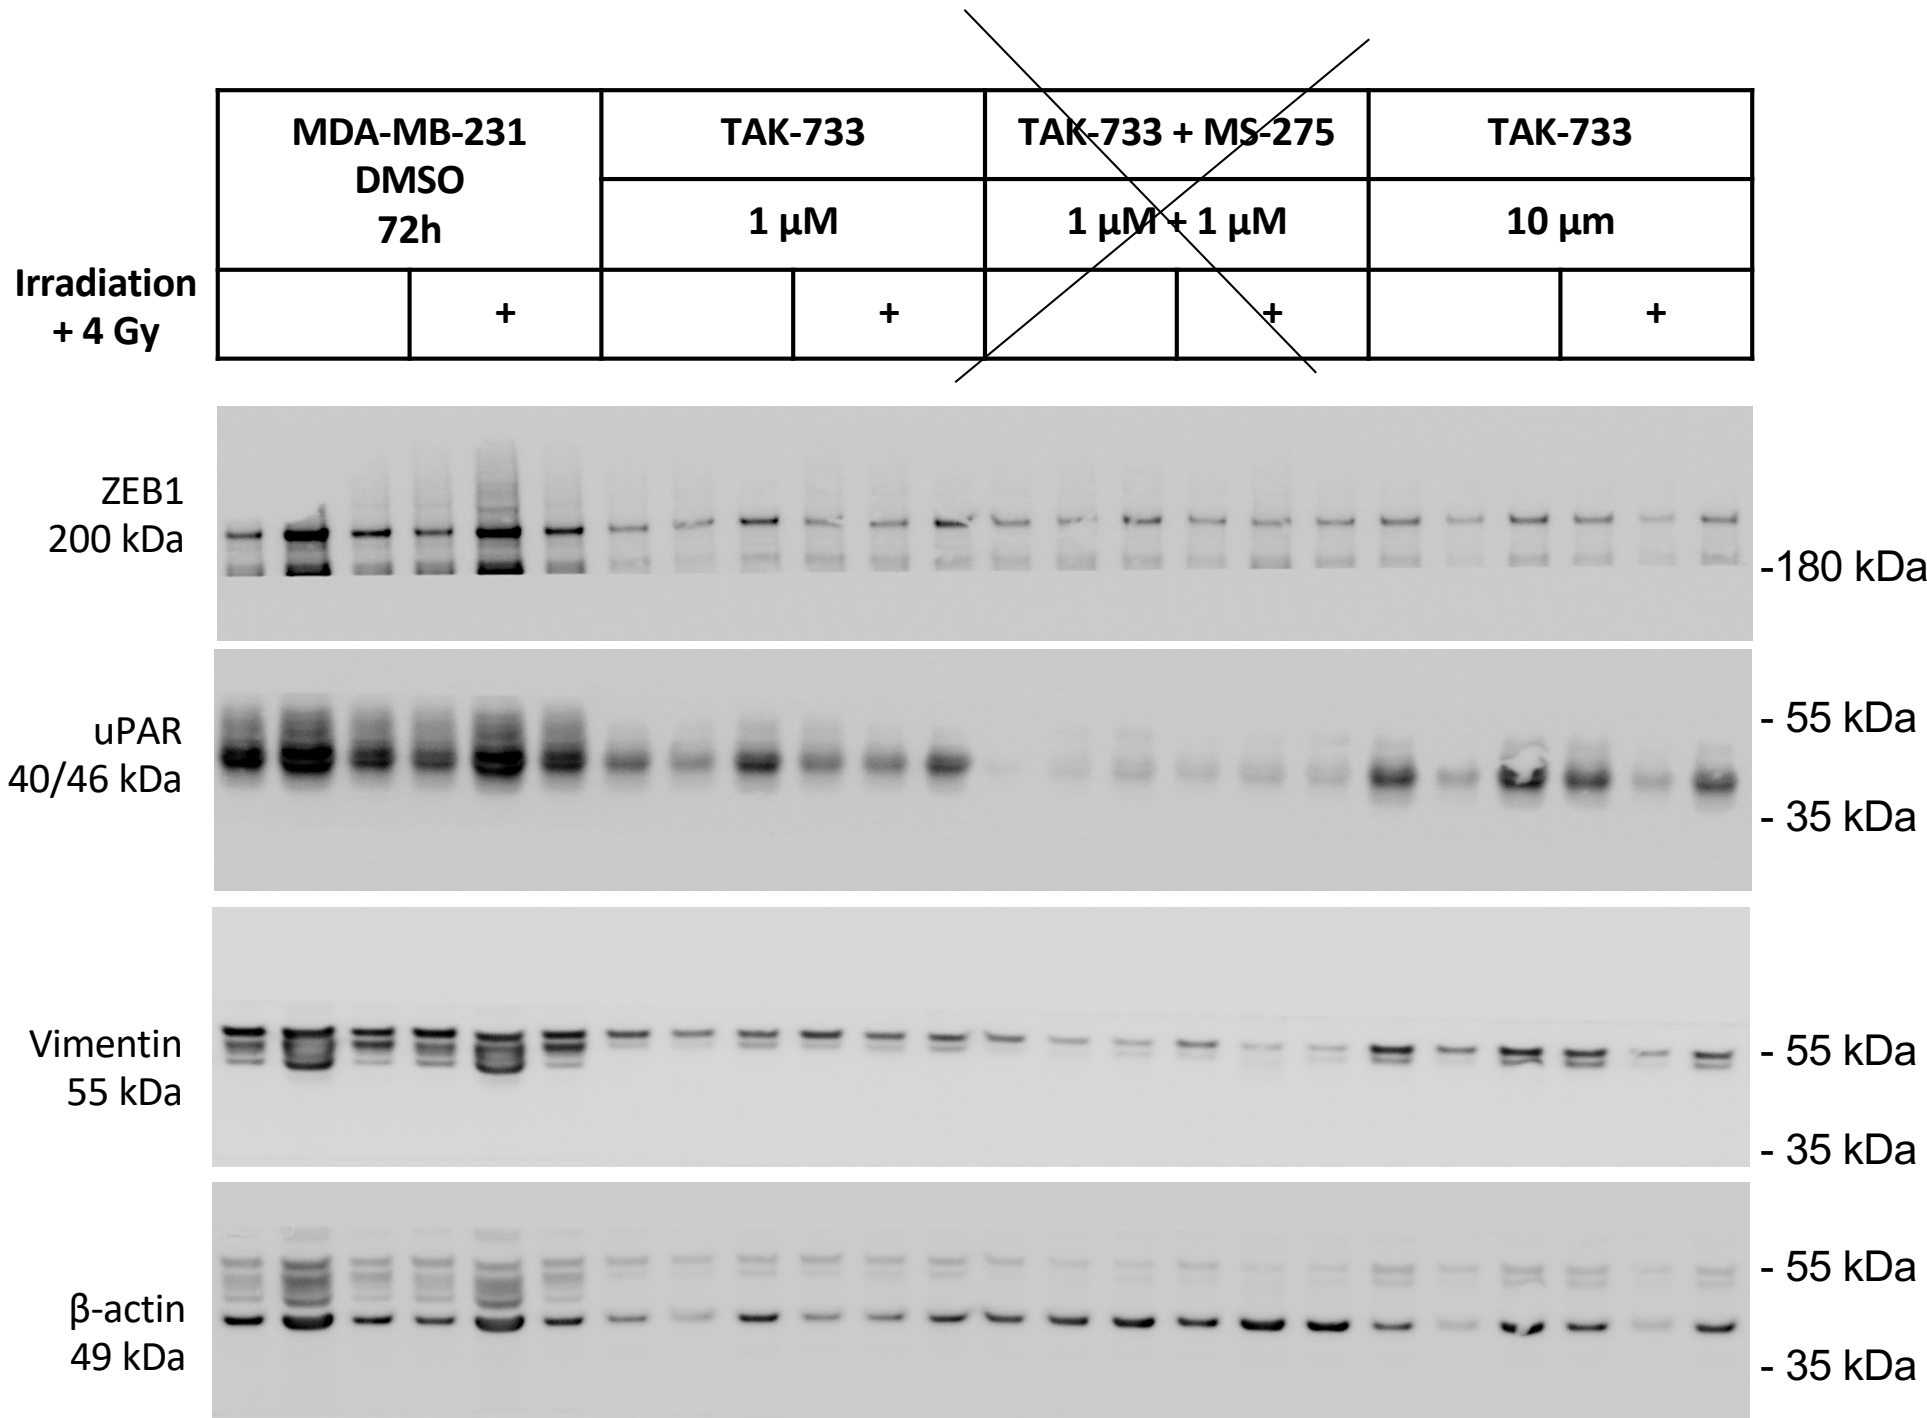

Supplement: s1 [file s1]

Figure S3

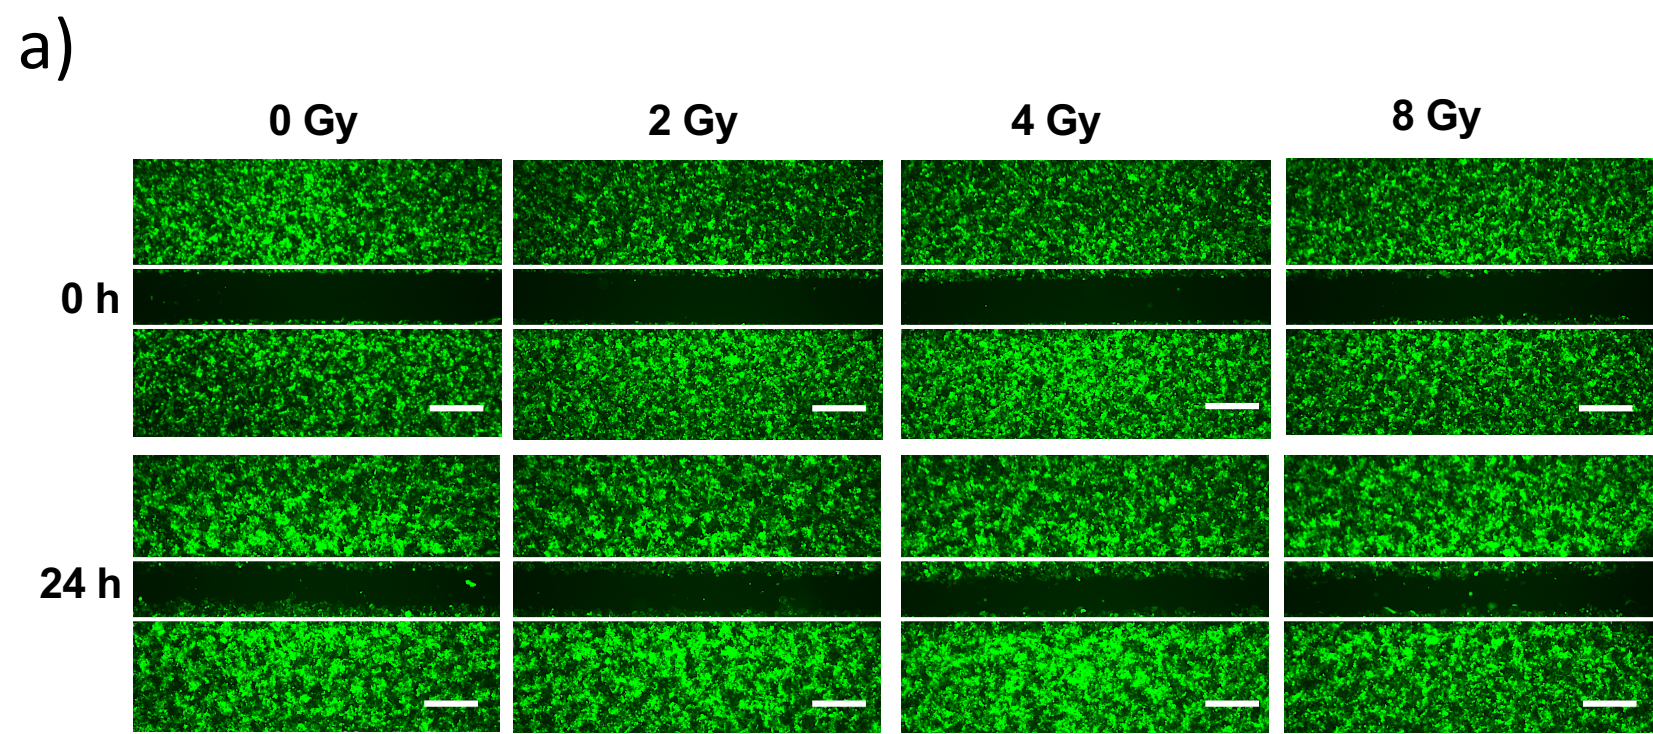

b)

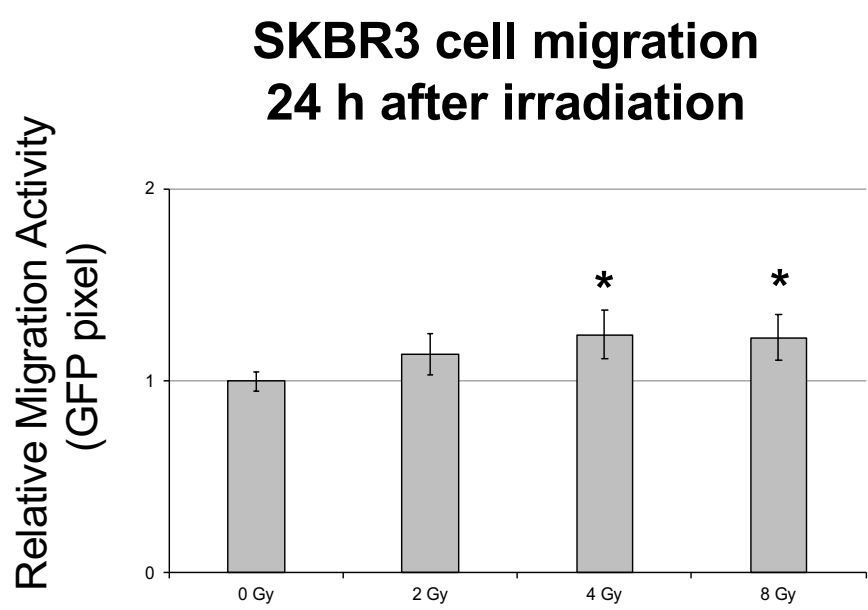

c)

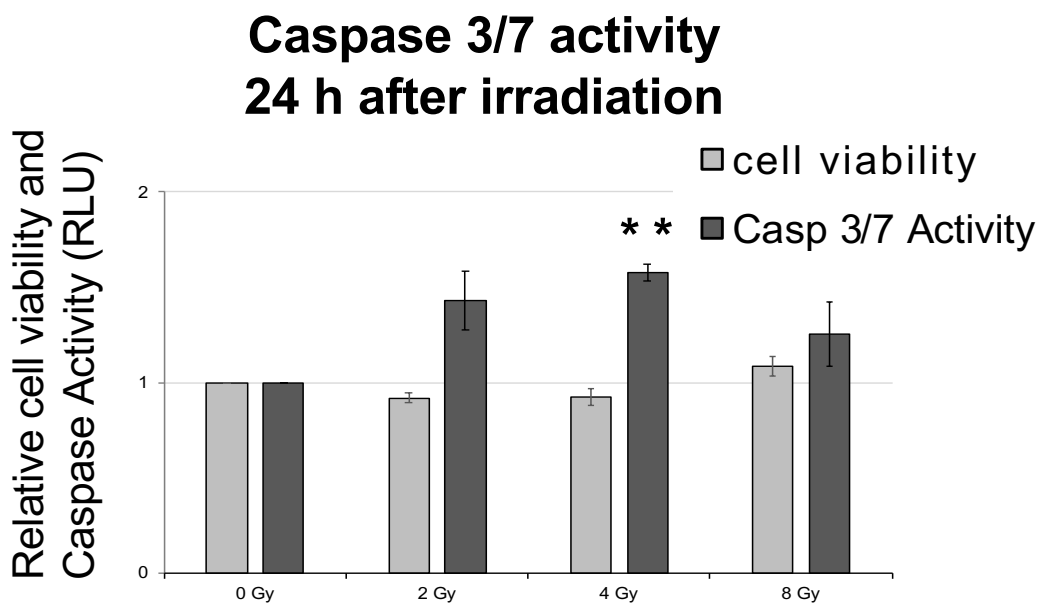

Supplement: s1 [file s1]
